# Supplementary material for: The mature EV71 virion induced a broadly cross-neutralizing VP1 antibody against subtypes of the EV71 virus
Source: PubMed Central journal article supplement (PMC6334917; doi:10.1371/journal.pone.0210553), 2019-01-16
Supplement: pone.0210553.s002.pdf [file pone.0210553.s002.pdf]

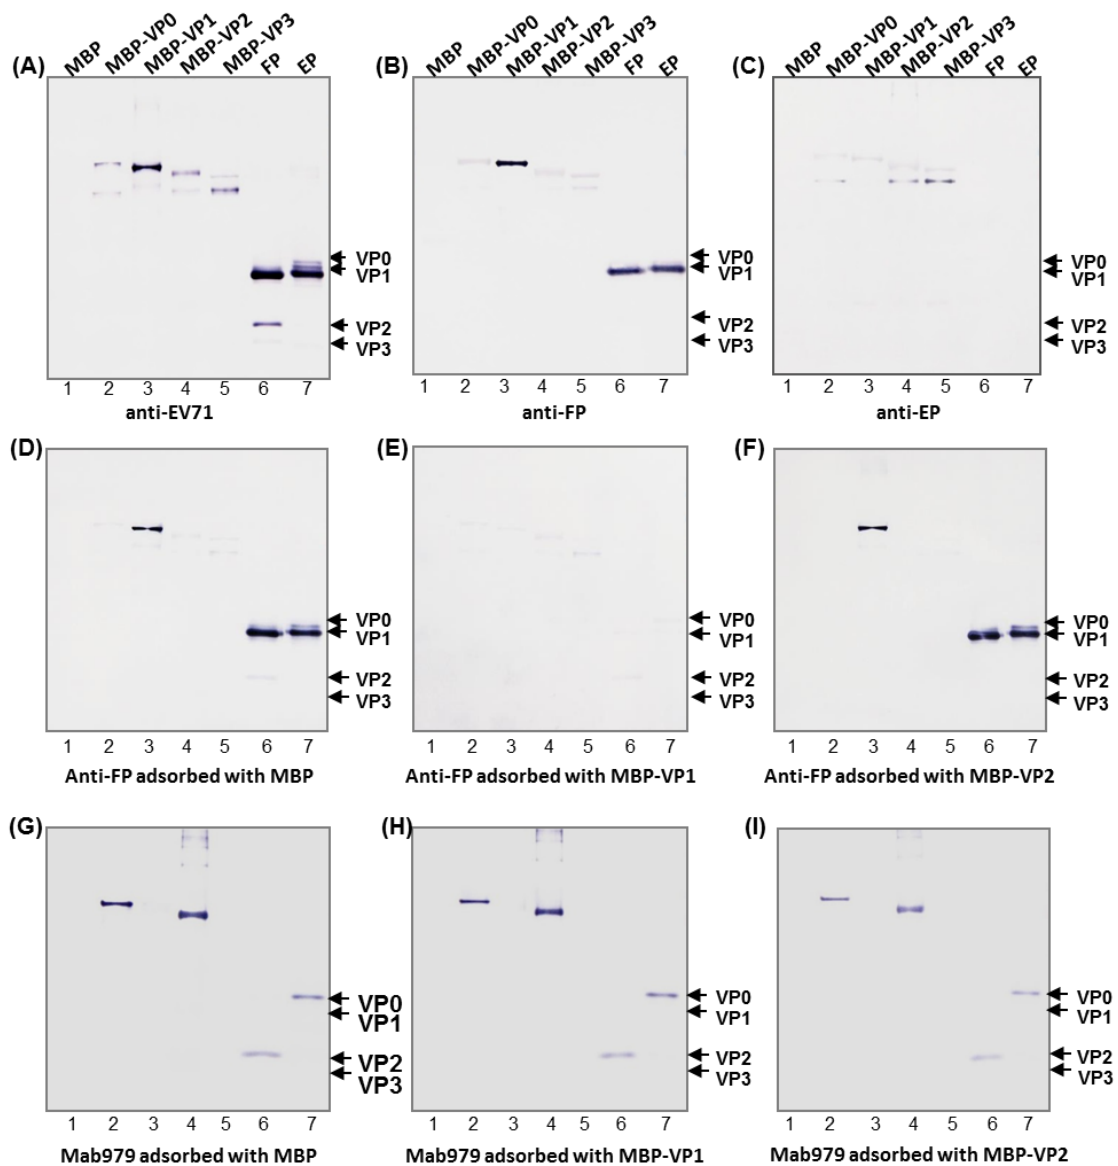

1

2 **S1 Fig. Western blot analysis of the binding specificity of anti-EV71, anti-FP and**

3 **anti-EP.** Protein samples of MBP, MBP-VP0, MBP-VP1, MBP-VP2, MBP-VP3, FPs

4 and EPs from EV71 were separated on a 10% SDS-PAGE gel and transferred to a

5 PVDF membrane for western blot analysis against the (A) anti-EV71 vaccine, (B)

6 anti-FP, and (C) anti-EP. The binding titer reduction after protein adsorption

7 treatment was confirmed by western blot analysis with probes consisting of anti-FP

- 8 adsorbed with MBP (D), anti-FP adsorbed with MBP-VP1 (E), anti-FP adsorbed with
- 9 MBP-VP2 (F), anti-MAB979 adsorbed with MBP (G), anti-MAB979 adsorbed with
- 10 MBP-VP1 (H), and anti-MAB979 adsorbed with MBP-VP2 (I).
