# Supplementary material for: The mature EV71 virion induced a broadly cross-neutralizing VP1 antibody against subtypes of the EV71 virus
Source: PubMed Central journal article supplement (PMC6334917; doi:10.1371/journal.pone.0210553), 2019-01-16
Supplement: pone.0210553.s004.pdf [file pone.0210553.s004.pdf]

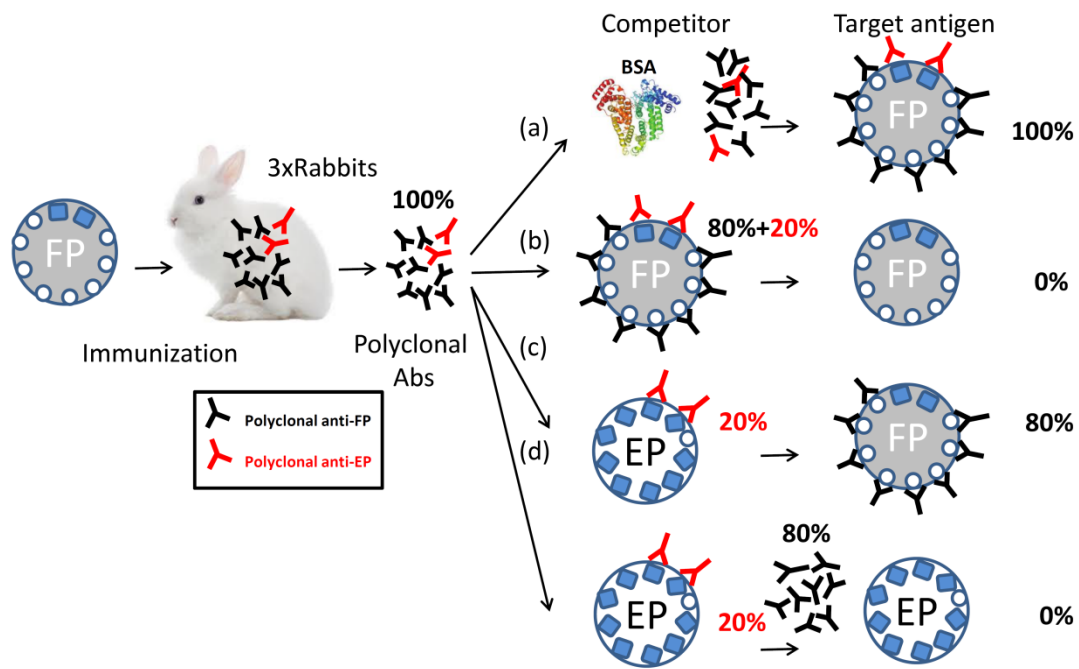

1  
2

3 **S3 Fig. Proposed mode of specificity for anti-FP binding to FP and EP in the**  
 4 **competitive ELISA study.** Rabbits were immunized with FPs to generate antibodies  
 5 that recognized FPs or EPs. In the competitive ELISA, the binding specificity for FPs  
 6 of anti-FP blocked by BSA was defined as 100% (a). The binding specificity for FP of  
 7 anti-FP blocked by FP was calculated as 0% (b). The binding specificity for FP of  
 8 anti-FP blocked by EP was calculated as 80% (c). The binding specificity for EP of  
 9 anti-FP blocked by EP was calculated as 0% (d).
