# Supplementary material for: The mature EV71 virion induced a broadly cross-neutralizing VP1 antibody against subtypes of the EV71 virus
Source: PubMed Central journal article supplement (PMC6334917; doi:10.1371/journal.pone.0210553), 2019-01-16
Supplement: pone.0210553.s005.pdf [file pone.0210553.s005.pdf]

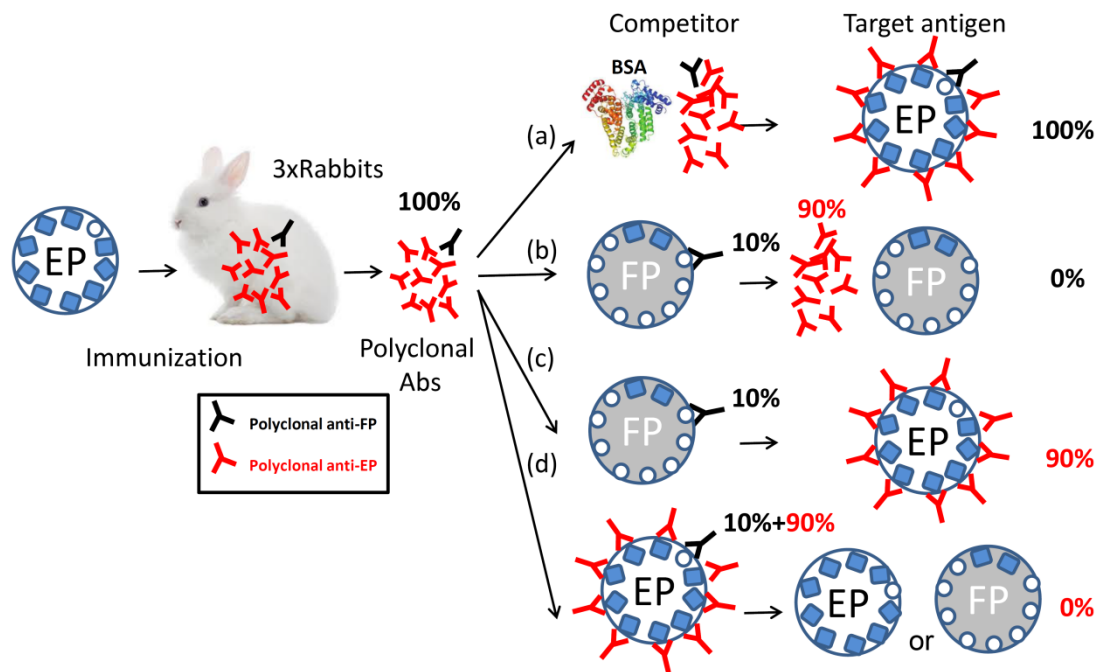

1

2 **S4 Fig. Proposed mode of specificity for anti-EP binding to FP and EP in the**

3 **competitive ELISA study.** Rabbits were immunized with EPs to generate antibodies

4 that recognized FPs or EPs. In the competitive ELISA, the binding specificity for EP

5 of anti-EP blocked by BSA was defined as 100% (a). The binding specificity for FP of

6 anti-EP blocked by FP was calculated as 0% (b). The binding specificity for EP of

7 anti-EP blocked by FP was calculated as 90% (c). The binding specificity for EP or FP

8 of anti-EP blocked by EP was calculated as 0% (d).

9
